# Supplementary material for: Association of hypernatremia with outcomes of COVID-19 patients: A systematic review and meta-analysis
Source: PubMed Central journal article supplement — Medicine (Baltimore). 2022 Dec 23;101(51):e32535. doi: 10.1097/MD.0000000000032535 (PMC9794240; doi:10.1097/md.0000000000032535), 2022-12-23
Supplement: medi-101-e32535-s001.pdf [file medi-101-e32535-s001.pdf]

Hypernatraemia and covid

Pubmed 110

((covid-19) OR (coronavirus disease)) OR (SARS-COV2)) AND (((hypernatremia) OR (hypernatrem\*)) OR (high sodium))

Googlescholar 10

allintitle: hypernatremia coronavirus OR covid-19 OR sars-cov2

science direct- 11

((covid-19) OR (coronavirus disease)) OR (SARS-COV2)) AND (((hypernatremia) OR (hypernatremic)) OR (high sodium))
