# Supplementary material for: Association of hypernatremia with outcomes of COVID-19 patients: A systematic review and meta-analysis
Source: PubMed Central journal article supplement — Medicine (Baltimore). 2022 Dec 23;101(51):e32535. doi: 10.1097/MD.0000000000032535 (PMC9794240; doi:10.1097/md.0000000000032535), 2022-12-23
Supplement: medi-101-e32535-s002.pdf [file medi-101-e32535-s002.pdf]

|                     | Manjil | Unnat | Total Score |                                                                                               |
|---------------------|--------|-------|-------------|-----------------------------------------------------------------------------------------------|
|                     |        |       |             | Quality(8-9 points = high quality, 5-7 points = good/medium quality, <5 points = low quality) |
| Asghar et al.       | 6      | 8     | 7           | moderate                                                                                      |
| Atila et al.        | 9      | 9     | 9           | High                                                                                          |
| Berni et al.        | 7      | 9     | 8           | High                                                                                          |
| Duan et al.         | 7      | 7     | 7           | moderate                                                                                      |
| Hirsch et al.       | 9      | 9     | 9           | High                                                                                          |
| Hu et al.           | 9      | 9     | 9           | High                                                                                          |
| Longhitano et al.   | 6      | 8     | 7           | moderate                                                                                      |
| Wu et al            | 8      | 8     | 8           | High                                                                                          |
| Sarvazad et al      | 9      | 9     | 9           | High                                                                                          |
| Wang et al          | 6      | 6     | 6           | moderate                                                                                      |
| Tzoulis et al       | 9      | 9     | 9           | High                                                                                          |
| Trecarichi et al    | 6      | 6     | 6           | moderate                                                                                      |
| Sjöström et al,2021 | 10     | 8     | 9           | High                                                                                          |
| Sjöström et al,2020 | 9      | 7     | 8           | High                                                                                          |
| Ruiz-Sánchez et al  | 8      | 8     | 8           | High                                                                                          |
| Maniero et al       | 9      | 7     | 8           | High                                                                                          |
| Maguire et al       | 9      | 9     | 9           | High                                                                                          |
