# Supplementary material for: Association of hypernatremia with outcomes of COVID-19 patients: A systematic review and meta-analysis
Source: PubMed Central journal article supplement — Medicine (Baltimore). 2022 Dec 23;101(51):e32535. doi: 10.1097/MD.0000000000032535 (PMC9794240; doi:10.1097/md.0000000000032535), 2022-12-23
Supplement: medi-101-e32535-s003.pdf [file medi-101-e32535-s003.pdf]

Hypernatremia and ICU outcome:

Meta regression

| Factor | coeff     | 95%CI               | P value | Z value | R-square(%) |
|--------|-----------|---------------------|---------|---------|-------------|
| Age    | -.3129274 | -.43444, -.1914116  | 0.000   | -5.05   | 99.50%      |
| Male   | 0.0365806 | -.18460, .257767    | 0.746   | 0.32    | 0.00        |
| HTN    | -.2054482 | -.6523508, .2414544 | 0.368   | -0.90   | 0.00        |
| DM     | -.1296891 | -.498998, .23962    | 0.491   | -.069   | 0.00        |

Hypernatremia and mortality:

Meta regression:

| Variable | Coef.     | 95%CI               | P value | z     | R-square(%) |
|----------|-----------|---------------------|---------|-------|-------------|
| Age      | 0.068154  | -.0059157, 0.14223  | 0.071   | 1.80  | 5.02        |
| Male     | -.0593107 | -.12763, 0.009018   | 0.089   | -1.70 | 7.30        |
| HTN      | 0.106269  | -.0151027, 0.363564 | 0.418   | 0.81  | 0.00        |
| DM       | 0.00548   | -0.308736, 0.418421 | 0.768   | 0.30  | 0.00        |
| CKD      | -.008763  | -.02552, 0.0079997  | 0.306   | -1.02 | 6.78        |
| CVD      | -.0065368 | -.02145, 0.0073803  | 0.357   | -0.92 | 47.29       |

Hypernatremia and prolong hospital stay:

MetaRegression not associated

Hypernatremia and intubation:

| Variable | coef      | 95% CI             | P value | z     | R square% |
|----------|-----------|--------------------|---------|-------|-----------|
| Age      | -.0561487 | -.187616, .0753185 | 0.403   | -0.84 | 0.00      |
| Male     | 0.19298   | -.10016, .1387639  | 0.752   | 0.32  | 0.00      |
| HTN      | 0.3582    | -.2068, .27847     | 0.772   | 0.29  | 0.00      |
| DM       | -.06643   | -.1657, .03291     | 0.19    | -1.31 | 50.48     |
| CKD      | -.0640764 | -.35718, .23103    | 0.67    | -0.43 | 0.00      |
| CVD      | .233074   | -.6314692, 1.09761 | 0.59    | 0.53  | 0.00      |
