# Supplementary material for: Association of hypernatremia with outcomes of COVID-19 patients: A systematic review and meta-analysis
Source: PubMed Central journal article supplement — Medicine (Baltimore). 2022 Dec 23;101(51):e32535. doi: 10.1097/MD.0000000000032535 (PMC9794240; doi:10.1097/md.0000000000032535), 2022-12-23
Supplement: medi-101-e32535-s004.pdf [file medi-101-e32535-s004.pdf]

### Hypernatremia and ICU:

Regression based Eggers test:  $P=0.8177$

Begg's test:  $P=0.8065$

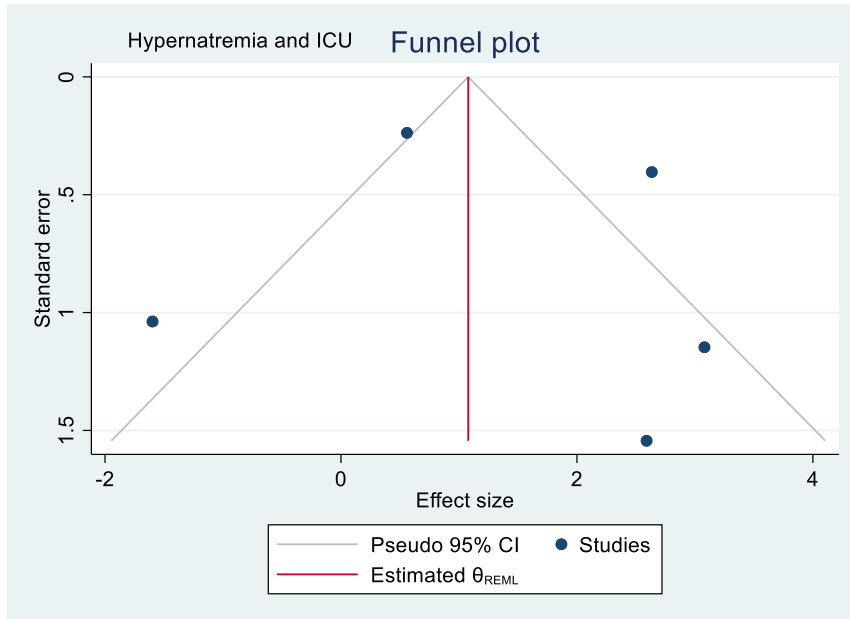

### Hypernatremia and mortality:

Regression based Egger test: P value: 0.0246

Begg's test: 0.0865

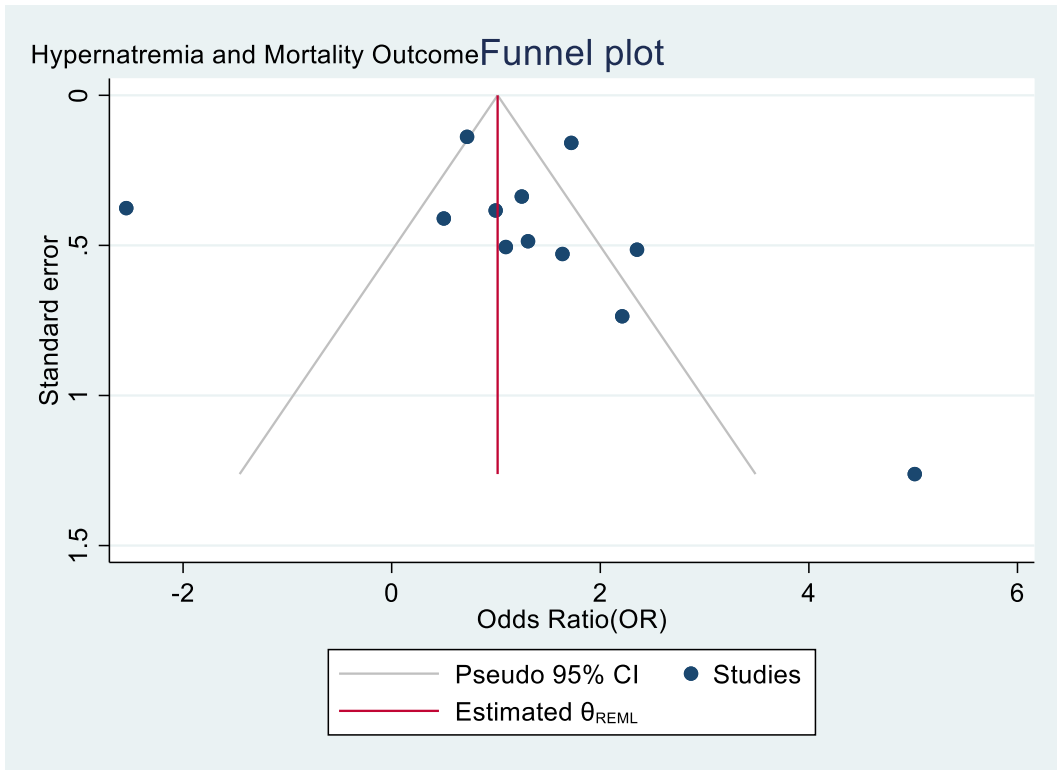

#### Hypernatremia and prolong hospital stay

Regression based Egger test: P value= 0.8317

Begg's test: 1.692

### Hypernatremia and Hospital Stay Outcome

#### Funnel plot

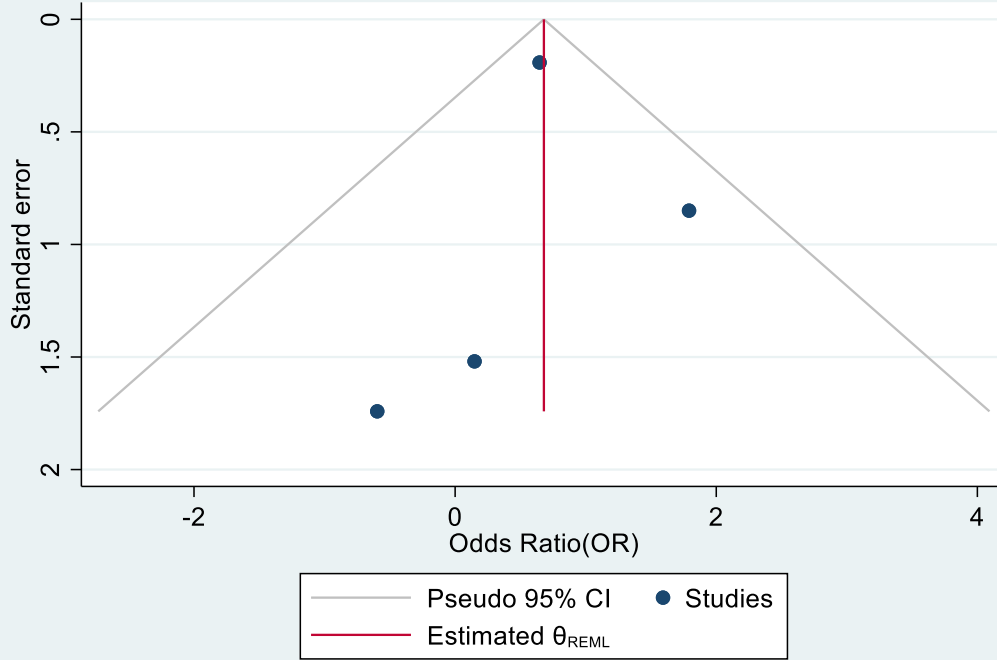

#### Hypernatremia and ventilation:

Regression based Eggers test: P value: 0.2052

Begg's test: P value: 1.632

### Hypernatremia and Ventilation/Intubation Outcome Funnel plot

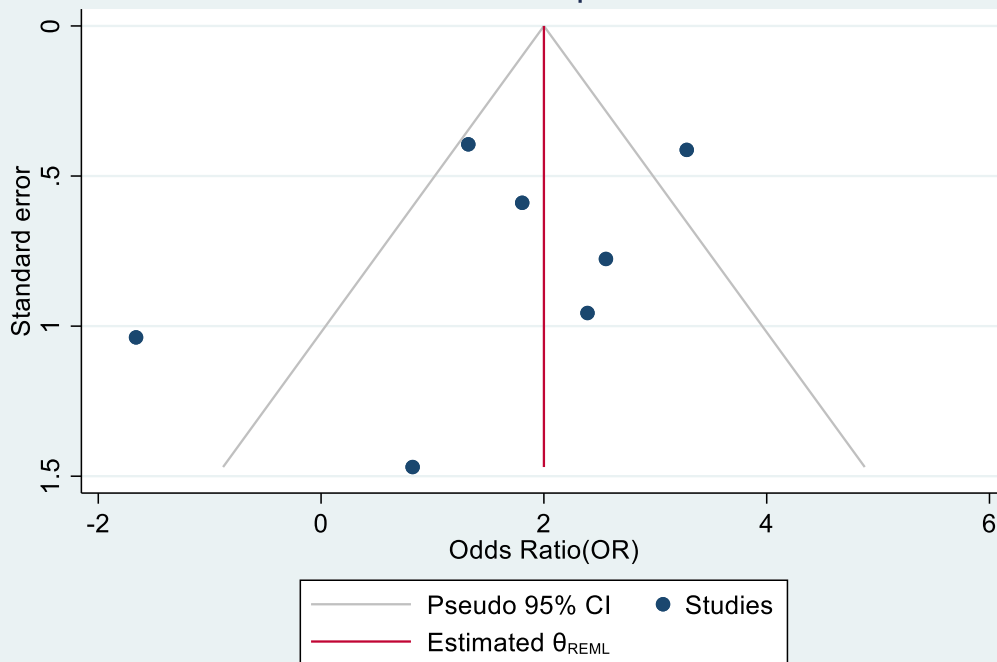

**Sensitivity analysis:**

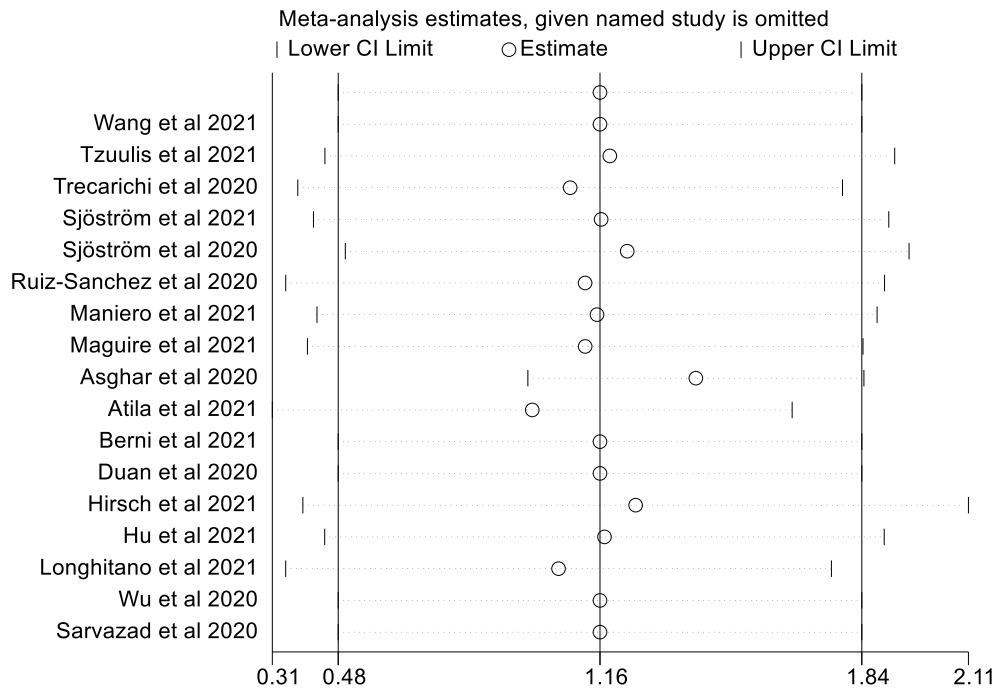

Omitting Atila and Asghar et al, Odds Ratio: 3.674, 95% CI: 2.458, 5.492, I2%= 73.25
